# Supplementary material
Source: publisher figshare collection journal article supplement (https://acs.figshare.com/ndownloader/files/3590673)
Supplement: Supplementary file 1 [file 3590673]

**Table S1:** Data obtained during gradient development (chromatograms shown in Figure S1) for the separation of 0.02 g L<sup>-1</sup> asphaltenes. Tetrahydrofuran (THF), acetonitrile (MeCN), N-methyl-2-pyrrolidinone (NMP).

|                     |                  |      |      |      |      |      |      |                     |                  |      |      |      |      |      |      |      |
|---------------------|------------------|------|------|------|------|------|------|---------------------|------------------|------|------|------|------|------|------|------|
| Solvent Composition | Run 1            |      |      |      |      |      |      | Solvent Composition | Run 6            |      |      |      |      |      |      |      |
|                     | Time (min)       | 0    | 2.5  | 9    | 19   | 30   | 35   |                     | Time (min)       | 0    | 5    | 10   | 15   | 25   |      |      |
|                     | THF              | 0.0% | 0.0% | 30%  | 50%  | 51%  | 50%  |                     | THF              | 0.0% | 25%  | 45%  | 50%  | 40%  |      |      |
|                     | NMP              | 0.0% | 0.0% | 20%  | 40%  | 47%  | 50%  |                     | NMP              | 0.0% | 0.0% | 10%  | 50%  | 60%  |      |      |
|                     | MeCN             | 40%  | 50%  | 30%  | 5%   | 1.0% | 0.0% |                     | MeCN             | 75%  | 60%  | 40%  | 0.0% | 0.0% |      |      |
|                     | H <sub>2</sub> O | 60%  | 50%  | 20%  | 5%   | 1.0% | 0.0% |                     | H <sub>2</sub> O | 25%  | 15%  | 5.0% | 0.0% | 0.0% |      |      |
|                     | P'               | 8.44 | 8.00 | 6.32 | 5.48 | 5.35 | 5.35 |                     | P'               | 6.90 | 6.01 | 5.30 | 5.35 | 5.62 |      |      |
| Solvent Composition | Run 2            |      |      |      |      |      |      | Solvent Composition | Run 7            |      |      |      |      |      |      |      |
|                     | Time (min)       | 0    | 2.5  | 10   | 20   | 30   | 45   |                     | Time (min)       | 0    | 5    | 10   | 12.5 | 25   |      |      |
|                     | THF              | 0.0% | 0.0% | 40%  | 50%  | 51%  | 50%  |                     | THF              | 0.0% | 10%  | 40%  | 80%  | 80%  |      |      |
|                     | NMP              | 0.0% | 0.0% | 10%  | 40%  | 47%  | 50%  |                     | NMP              | 0.0% | 15%  | 20%  | 20%  | 20%  |      |      |
|                     | MeCN             | 40%  | 50%  | 30%  | 5.0% | 1.0% | 0.0% |                     | MeCN             | 75%  | 60%  | 30%  | 0.0% | 0.0% |      |      |
|                     | H <sub>2</sub> O | 60%  | 50%  | 20%  | 5.0% | 1.0% | 0.0% |                     | H <sub>2</sub> O | 25%  | 15%  | 10%  | 0.0% | 0.0% |      |      |
|                     | P'               | 8.44 | 8.00 | 6.05 | 5.48 | 5.35 | 5.35 |                     | P'               | 6.90 | 6.42 | 5.70 | 4.54 | 4.54 |      |      |
| Solvent Composition | Run 3            |      |      |      |      |      |      | Solvent Composition | Run 8            |      |      |      |      |      |      |      |
|                     | Time (min)       | 0    | 2.5  | 10   | 25   | 30   | 40   |                     | Time (min)       | 0    | 5    | 10   | 12.5 | 25   |      |      |
|                     | THF              | 0.0% | 10%  | 40%  | 50%  | 49%  | 50%  |                     | THF              | 0.0% | 5.0% | 20%  | 60%  | 80%  |      |      |
|                     | NMP              | 0.0% | 10%  | 10%  | 46%  | 49%  | 50%  |                     | NMP              | 0.0% | 20%  | 30%  | 40%  | 20%  |      |      |
|                     | MeCN             | 55%  | 45%  | 30%  | 2.0% | 1.0% | 0.0% |                     | MeCN             | 75%  | 60%  | 40%  | 0.0% | 0.0% |      |      |
|                     | H <sub>2</sub> O | 45%  | 35%  | 20%  | 2.0% | 1.0% | 0.0% |                     | H <sub>2</sub> O | 25%  | 15%  | 10%  | 0.0% | 0.0% |      |      |
|                     | P'               | 7.78 | 7.25 | 6.05 | 5.40 | 5.40 | 5.35 |                     | P'               | 6.90 | 6.55 | 6.15 | 5.08 | 4.54 |      |      |
| Solvent Composition | Run 4            |      |      |      |      |      |      | Solvent Composition | Run 9            |      |      |      |      |      |      |      |
|                     | Time (min)       | 0    | 2.5  | 10   | 20   | 25   | 30   |                     | Time (min)       | 0    | 5    | 10   | 12.5 | 15   | 25   | 30   |
|                     | THF              | 0.0% | 25%  | 40%  | 47%  | 49%  | 50%  |                     | THF              | 0.0% | 5.0% | 20%  | 70%  | 80%  | 90%  | 90%  |
|                     | NMP              | 0.0% | 0.0% | 10%  | 47%  | 49%  | 50%  |                     | NMP              | 0.0% | 20%  | 30%  | 30%  | 20%  | 10%  | 10%  |
|                     | MeCN             | 70%  | 55%  | 35%  | 3.0% | 1.0% | 0.0% |                     | MeCN             | 75%  | 60%  | 40%  | 0.0% | 0.0% | 0.0% | 0.0% |
|                     | H <sub>2</sub> O | 30%  | 20%  | 15%  | 3.0% | 1.0% | 0.0% |                     | H <sub>2</sub> O | 25%  | 15%  | 10%  | 0.0% | 0.0% | 0.0% | 0.0% |
|                     | P'               | 7.12 | 6.23 | 5.83 | 5.51 | 5.40 | 5.35 |                     | P'               | 6.90 | 6.55 | 6.15 | 4.81 | 4.54 | 4.27 | 4.27 |
| Solvent Composition | Run 5            |      |      |      |      |      |      |                     |                  |      |      |      |      |      |      |      |
|                     | Time (min)       | 0    | 2.5  | 10   | 20   | 30   |      |                     |                  |      |      |      |      |      |      |      |
|                     | THF              | 0.0% | 25%  | 40%  | 50%  | 40%  |      |                     |                  |      |      |      |      |      |      |      |
|                     | NMP              | 0.0% | 0.0% | 10%  | 50%  | 60%  |      |                     |                  |      |      |      |      |      |      |      |
|                     | MeCN             | 75%  | 60%  | 40%  | 0.0% | 0.0% |      |                     |                  |      |      |      |      |      |      |      |
|                     | H <sub>2</sub> O | 25%  | 15%  | 10%  | 0.0% | 0.0% |      |                     |                  |      |      |      |      |      |      |      |
|                     | P'               | 6.90 | 6.01 | 5.61 | 5.35 | 5.62 |      |                     |                  |      |      |      |      |      |      |      |

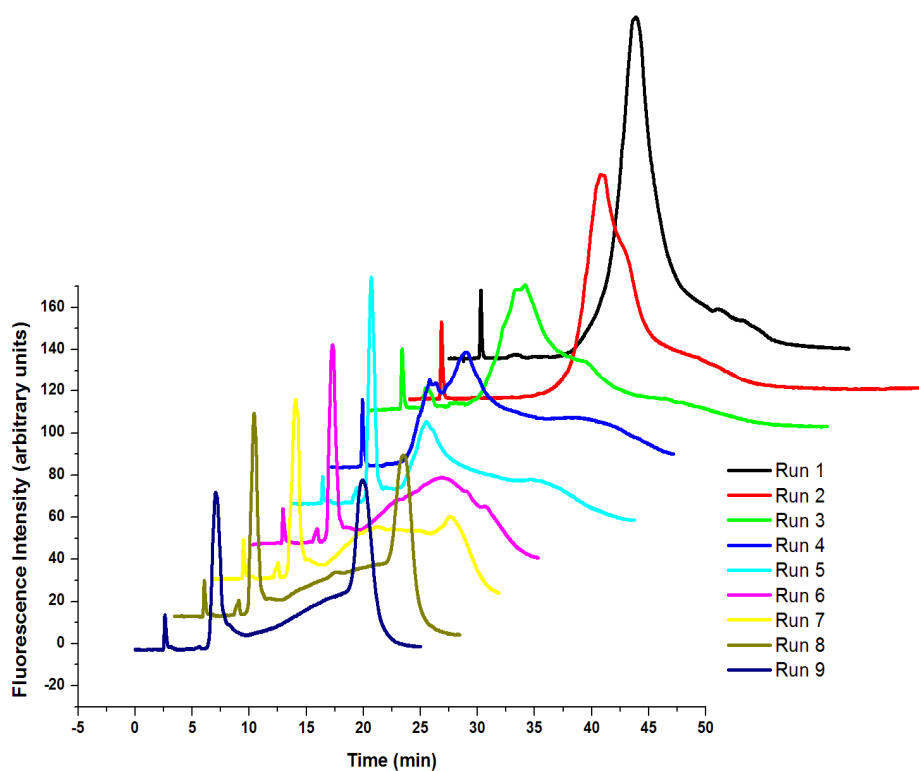

**Figure S1:** Progression of mobile phase gradient development (gradients described in Table S1) for the analytical scale separation of  $0.02 \text{ g L}^{-1}$  asphaltenes. Runs 1-9 progress in order from the top right to the bottom left.
